# Supplementary material for: Axoneme polyglutamylation regulated by Joubert syndrome protein ARL13B controls ciliary targeting of signaling molecules
Source: PubMed Central journal article supplement (PMC6098020; doi:10.1038/s41467-018-05867-1), 2018-08-17
Supplement: 41467_2018_5867_MOESM1_ESM.pdf [file 41467_2018_5867_MOESM1_ESM.pdf]

**Axoneme polyglutamylation regulated by Joubert syndrome protein  
ARL13B controls ciliary targeting of signaling molecules**

Kai et al.

Supplementary Information

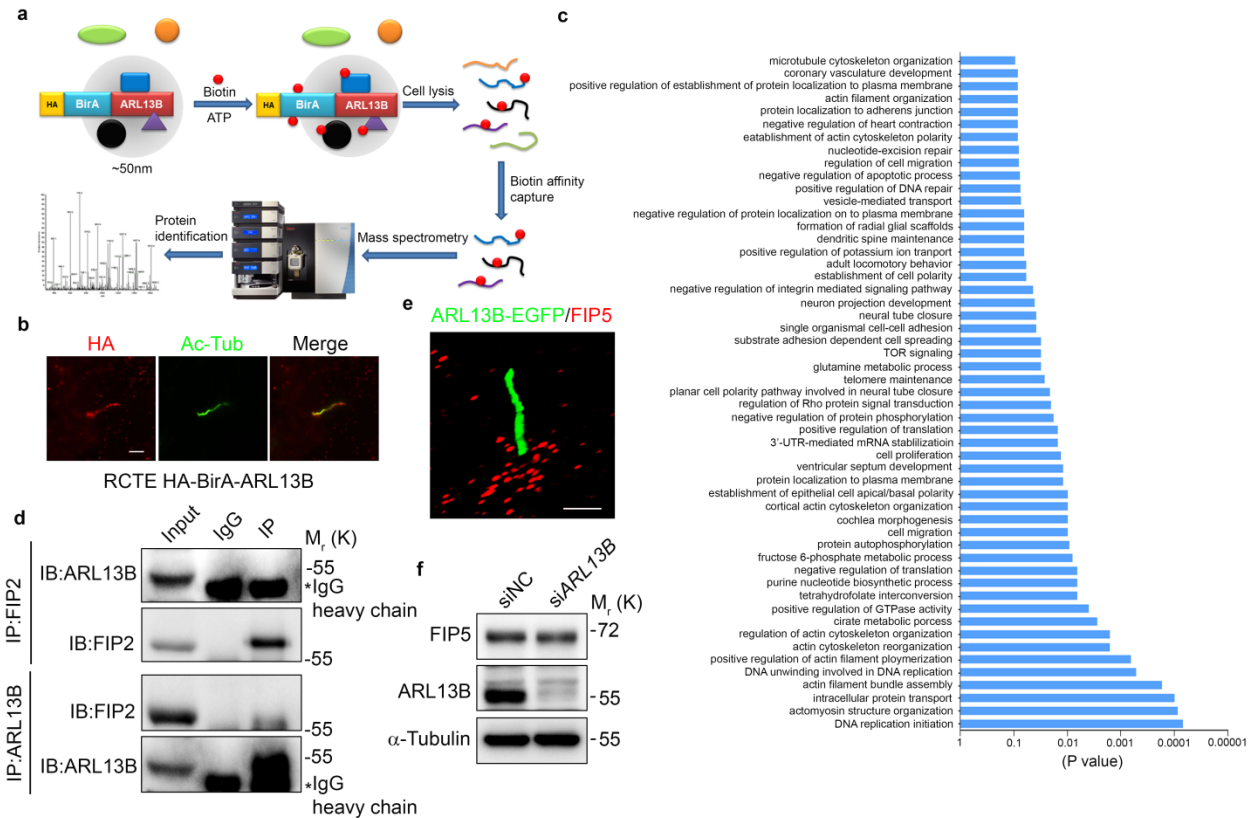

**Supplementary Figure 1. ARL13B associates with FIP5.** (a) Schematic model illustrating the work flow of Bio-ID experiment. (b) HA-BirA-ARL13B faithfully localizes in cilia in RCTE cells as seen by anti-HA antibody staining. (c) GO analysis of Bio-ID data. (d) In hTERT-RPE-1 cells, endogenous ARL13B does not associate with FIP2 during the early stage of ciliogenesis (4 h after serum starvation). (e) Structure illumination microscopic image of ARL13B-EGFP RCTE stable cells serum starved for 24 h. Images were processed by 3D transparency-rendering method. (f) Depletion of *ARL13B* does not affect expression levels of FIP5 as examined by western blotting. Scale bars: 2  $\mu$ m.

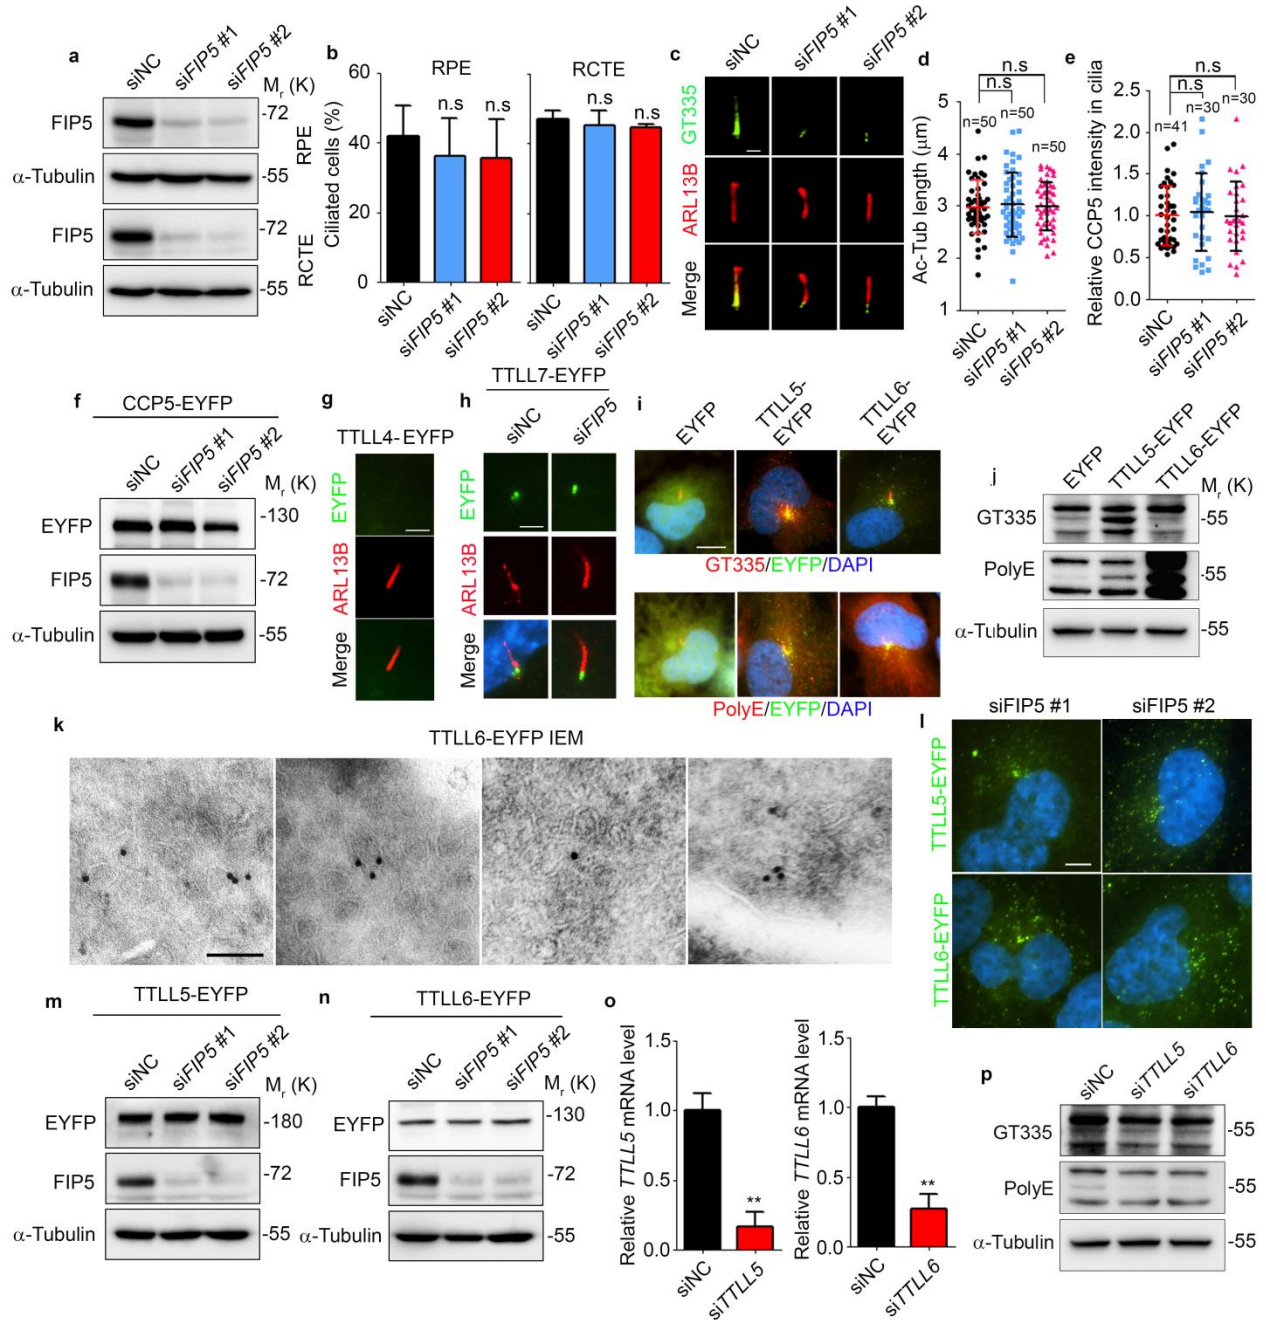

**Supplementary Figure 2. ARL13B and FIP5 regulate axoneme polyglutamylation.** (a) hTERT-RPE-1 and RCTE cells were treated with indicated siRNAs for 48 h. Efficiency of ARL13B siRNA was examined by western blotting. (b) Depletion of *FIP5* did not affect cilia formation as seen by examining the percentage of ciliated cells. (c) Depletion of *FIP5* totally abolished axoneme polyglutamylation in RCTE cells. (d) Depletion of *FIP5* did not affect axoneme acetylation in hTERT-RPE-1 cells as seen by measuring length of ciliary marker Ac-tub. N value: cilia number accessed from at least 6 fields. (e) Depletion of *FIP5* showed no effect on the ciliary level of CCP5 as examined by measuring ciliary intensity of CCP5-EYFP. N value: cilia number accessed from at least 6 fields. (f) Depletion of *FIP5* did not affect expression levels of CCP5-EYFP as examined by western blotting. (g) hTERT-RPE-1 stable cells

expressing TTLL4-EYFP cells were serum starved for 24 h. **(h)** hTERT-RPE-1 stable cells expressing TTLL7-EYFP were treated with indicated siRNAs and serum starved for 24 h. **(i, j)** Overexpression of TTLL5-EYFP and TTLL6-EYFP both induce hyperglutamylation of cytosolic microtubules but show different pattern in RPE cells in immunofluorescent **(i)** and western blotting **(j)**. Overexpression of TTLL5-EYFP increases total polyglutamylation of the cytosolic microtubules as shown strong increase of both GT335 and PolyE signal, while overexpression of TTLL6-EYFP only increases long chain polyglutamylation as shown significant increase of PolyE but not GT335 signal. **(k)** Cryo-thin section of TTLL6-EYFP RPE cells were subjected to immunogold electron microscopy 24h after serum starvation. TTLL6-EYFP was immunostained by GFP antibody. The white circles indicate endosomal vesicles and black dots indicate TTLL6-EYFP. **(l)** The focal planes that show dispersed TTLLs-EYFP vesicles in indicated cells were shown by immunofluorescent. **(m, n)** Depletion of *FIP5* showed no effect on the expression level of TTLL5-EYFP or TTLL6-EYFP as examined by western blotting. **(o)** hTERT-RPE-1 cells were treated with indicated siRNAs for 48 h. Efficiencies of *TTLL5/6* siRNAs were examined by real-time PCR. Data in **b** and **n** are the statistical analysis of three independent experiments. \*\*,  $p < 0.01$ . **n.s.**, no statistically significant difference. Statistical significance was determined using unpaired student's t test. Center values represent mean. Error bars represent s.d. **(p)** Knockdown of *TTLL5* or *TTLL6* shows no significant decrease on overall polyglutamylation of cytosolic microtubules. Scale bars in **c**, **g** and **h** are 2  $\mu\text{m}$ . Scale bar in **i** is 10  $\mu\text{m}$ . Scale bar in **k** is 100 nm. Scale bar in **l** is 5  $\mu\text{m}$ .

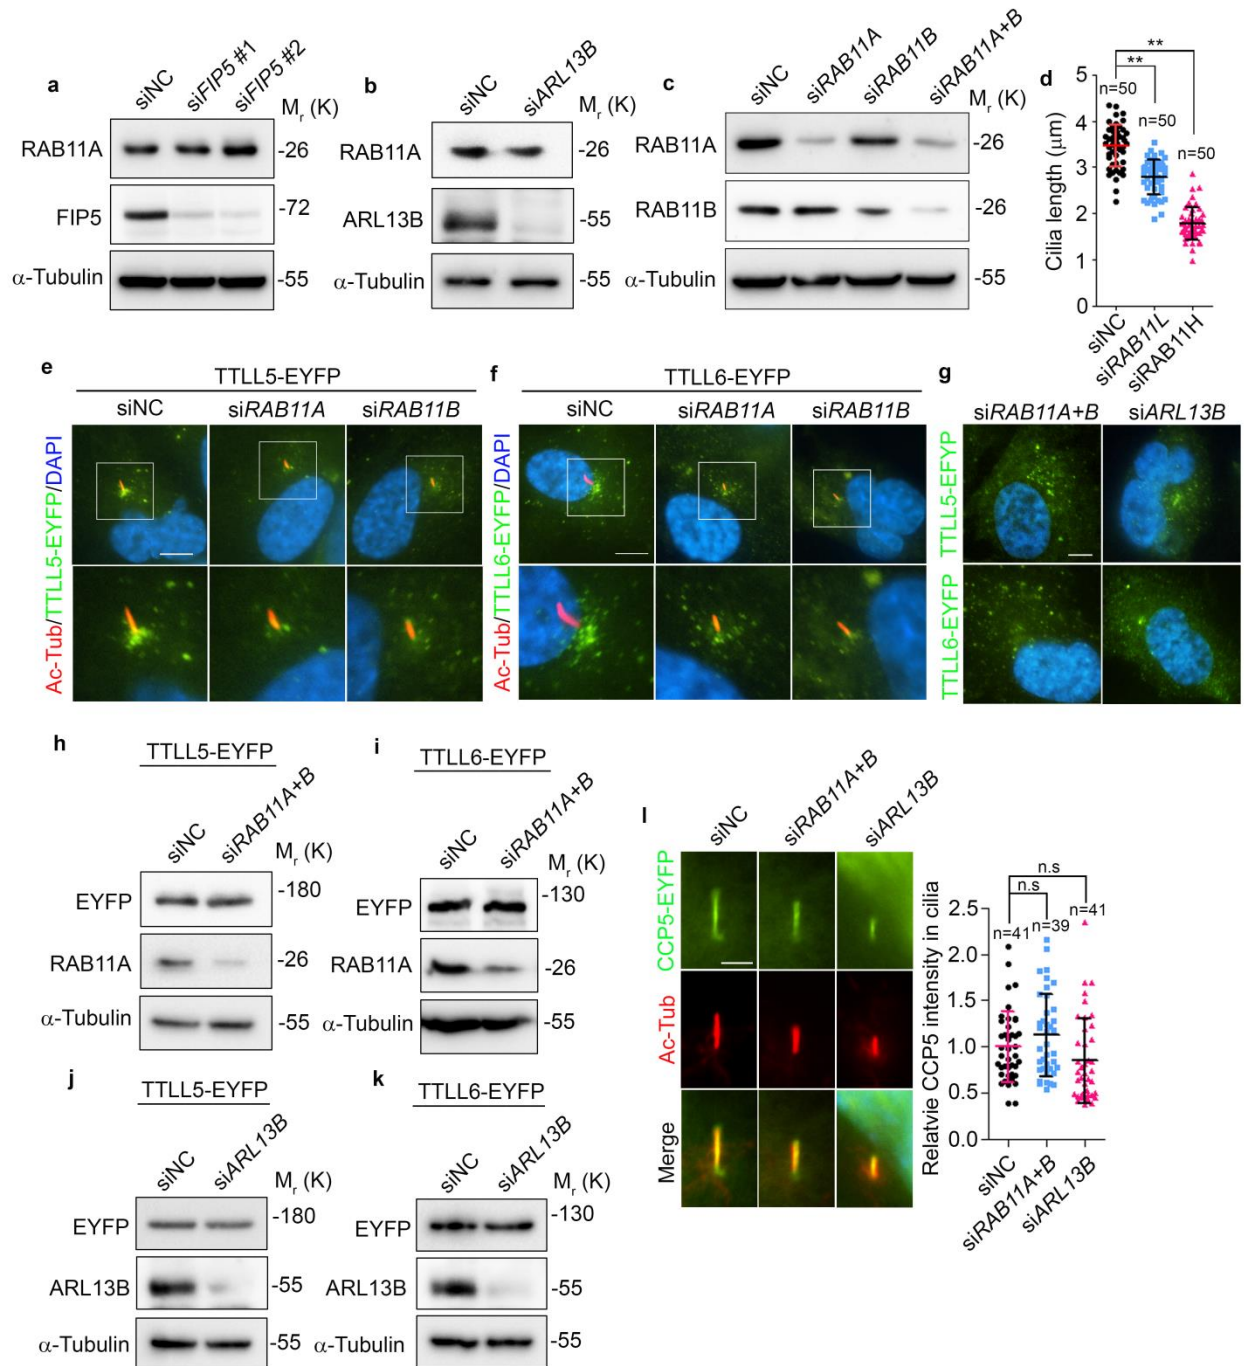

**Supplementary Figure 3. RAB11 regulates axoneme polyglutamylation.** (a) Depletion of *FIP5* did not affect the expression level of RAB11A as examined by western blotting. (b) Depletion of *ARL13B* did not affect the expression level of RAB11A as examined by western blotting. (c) hTERT-RPE-1 cells were treated with *RAB11A* or *RAB11B* siRNAs (20 nM) for 48 h. Efficiency of *RAB11* siRNAs was examined by western blotting. (d) hTERT-RPE-1 cells were treated with low (20 nM) or high (40 nM) dosage of *RAB11A+B* siRNAs for 48 h and serum starved for 24 h. Cilia length was quantified. N value: cilia number accessed from at least 6 fields. \*\*, p<0.01. (e, f) hTERT-RPE-1 stable cells expressing TTLL5-EYFP (e) and TTLL6-

EYFP (**f**) were treated with 20 nM *RAB11A* or *RAB11B* siRNAs for 48 h and serum starved for 24 h, the impaired enrichment of TLL5- or TLL6-positive vesicles at the ciliary base was observed. Ac-Tub was immunostained by antibodies and TLL5/6-EYFP was shown by direct fluorescence. (**g**) The focal planes that show dispersed TLLs-EYFP vesicles in indicated cells were shown by immunofluorescent. (**h, i**) Depletion of *RAB11A+B* did not affect the expression level of TLL5-EYFP or TLL6-EYFP as examined by western blotting. (**j, k**) Depletion of *ARL13B* did not affect the expression level of TLL5-EYFP or TLL6-EYFP as examined by western blotting. (**l**) Depletion of *RAB11A+B* or *ARL13B* showed no effect on the ciliary level of CCP5 as examined by measuring ciliary mean intensity of CCP5-EYFP. Ac-Tub was immunostained by antibodies and CCP5-EYFP was shown by direct fluorescence. Statistical significance was determined using unpaired student's t test. Center values represent mean. Error bars represent s.d. Scale bars in **e-g** are 5  $\mu$ m. Scale bar in **l** is 2  $\mu$ m.

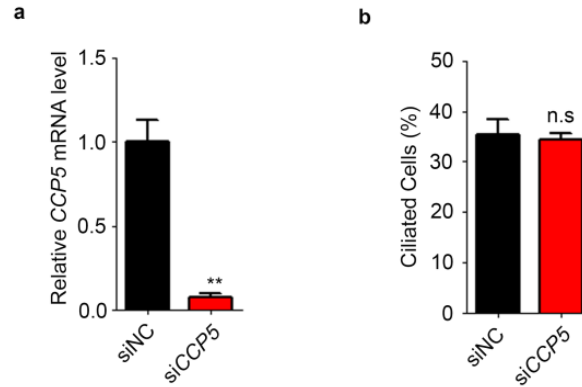

**Supplementary Figure 4. Depletion of *CCP5* does not affect ciliogenesis.** (a) hTERT-RPE-1 cells were treated with indicated siRNAs for 48 h. Efficiencies of *CCP5* siRNAs were examined by real-time PCR. \*\*,  $p < 0.01$ . (b) hTERT-RPE-1 cells were treated with indicated siRNAs for 48 h and serum starved for 24 h. Percentage of ciliated cells was quantified. Data are the statistical analysis of three independent experiments. **n.s.**, no statistically significant difference. Statistical significance was determined using unpaired student's t test. Center values represent mean. Error bars represent s.d.

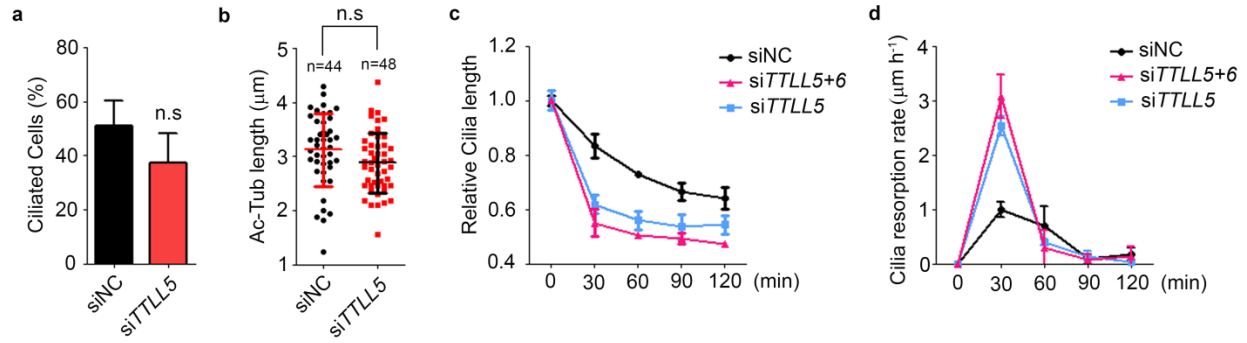

**Supplementary Figure 5. Depletion of *TLL5* does not affect ciliogenesis.** (a) hTERT-RPE-1 cells were treated with *TLL5* siRNAs for 48 h and serum starved for 24 h. Percentage of ciliated cells was quantified. Data are the statistical analysis of three independent experiments. (b) hTERT-RPE-1 cells were treated with *TLL5* siRNAs for 48 h and serum starved for 24 h. The length of acetylated axoneme was measured and quantified. (c, d) hTERT-RPE-1 cells were serum starved for 24 h and then cultured in the medium containing 20% FBS for the indicated times. Relative cilia length (c) and resorption rate (d) were measured and quantified at the indicated times. N value: cilia number accessed from at least 6 fields. n.s, no statistically significant difference. Statistical significance was determined using unpaired student's t test. Center values represent mean. Error bars represent s.d.



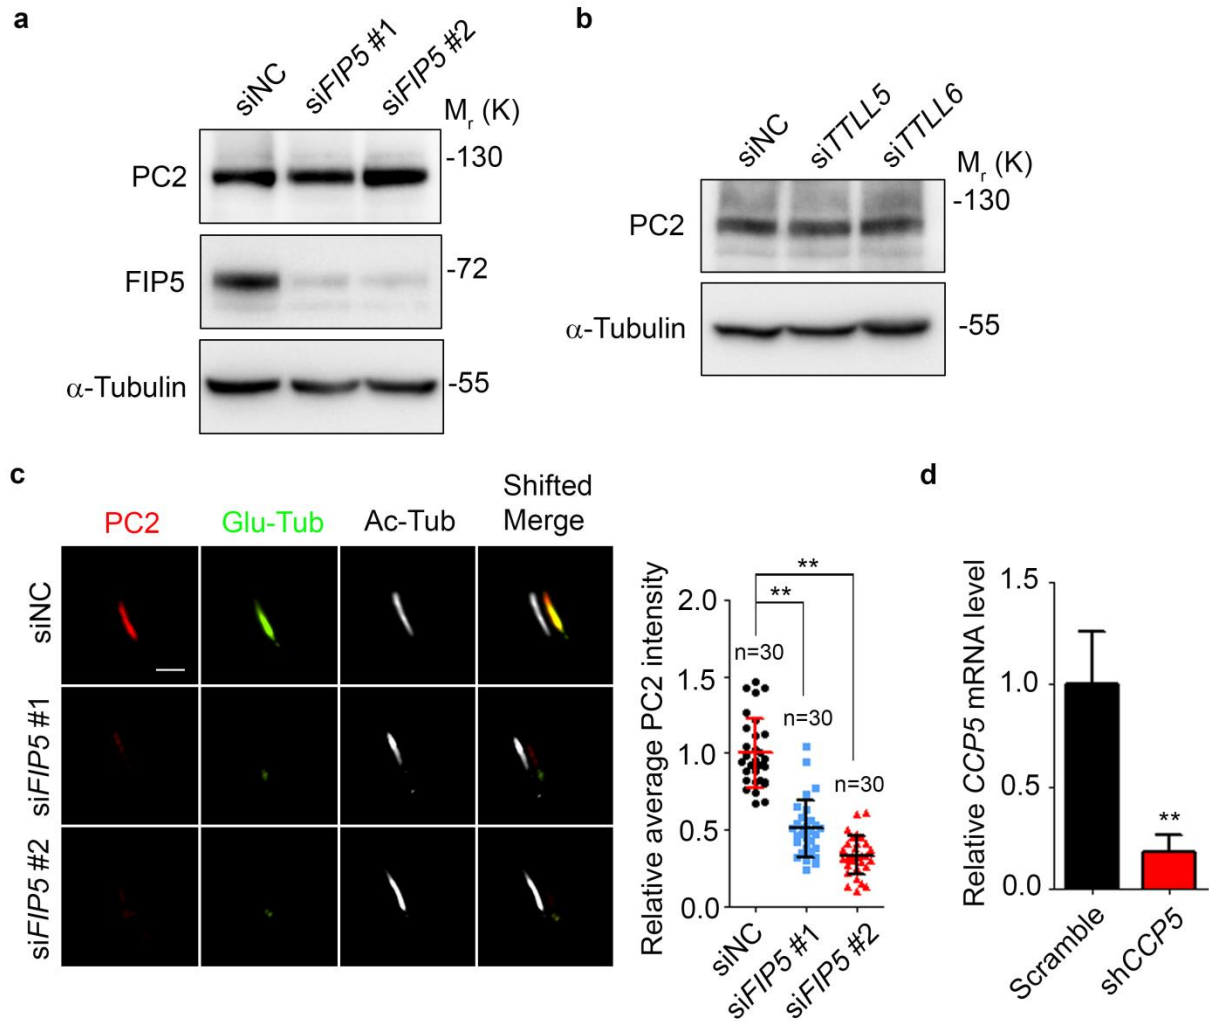

**Supplementary Figure 6. The correlation between axoneme polyglutamylation and polycystin ciliary localization.** (a, b) hTERT-RPE-1 cells were treated with indicated siRNAs for 48 h and serum starved for 24 h. The expression level of polycystin 2 (PC2) was examined by western blotting. (c) RCTE cells were treated with indicated siRNAs for 48 h and serum starved for 24 h and subjected to immunofluorescent staining. The relative intensity/ $\mu\text{m}^2$  of ciliary PC2 was quantified in the right panel. In *FIP5*-depleted cells, hypoglutamylated cilia were measured for quantifying the intensity/ $\mu\text{m}^2$  of ciliary PC2. Scale bar: 2  $\mu\text{m}$  **N** value: cilia number accessed from at least 6 fields. (d) hTERT-RPE-1 cells were treated with the indicated shRNAs using lentivirus system. Efficiency of shRNA targeting *CCP5* was examined by real-time PCR. Data are the statistical analysis of three independent experiments. Statistical significance was determined using unpaired student's t test. \*\*,  $p < 0.01$ . Center values represent mean. Error bars represent s.d.

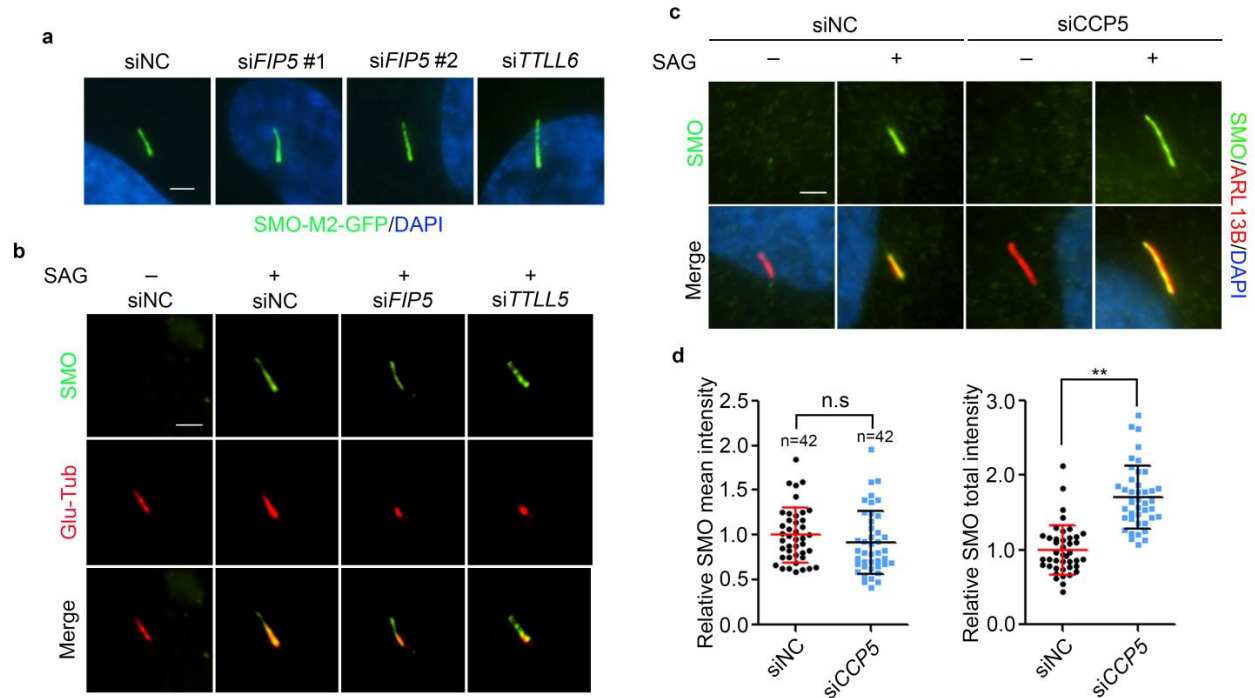

**Supplementary Figure 7. Axoneme hypoglutamylation does not affect SMO ciliary translocation.** (a) SMO-M2-GFP expressed hTERT-RPE-1 stable cells were treated with indicated siRNAs for 48 h and serum starved for 24 h. Ciliary localizations of SMO-M2-GFP were examined. (b) hTERT-RPE-1 cells were treated with the indicated siRNAs for 48 h, serum starved and treated with 500 nM SAG for 24 h. Ciliary localizations of SMO were examined. (c, d) hTERT-RPE-1 cells were treated with the *CCP5* siRNA for 48 h, serum starved and treated with 500 nM SAG for 24 h. Ciliary localizations of SMO were examined by immunofluorescent assay (c), and the mean or total intensity of ciliary SMO was quantified (d). Statistical significance was determined using unpaired student's t test. Center values represent mean. Error bars represent s.d. Scale bars: 2  $\mu$ m.

**Figure 1a**

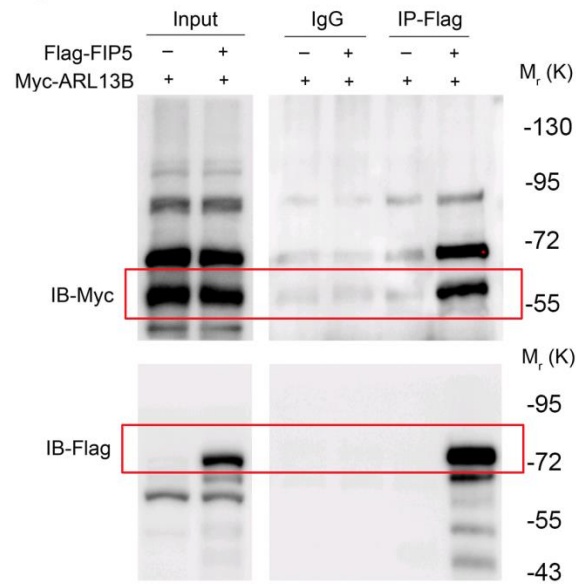

**Figure 1b**

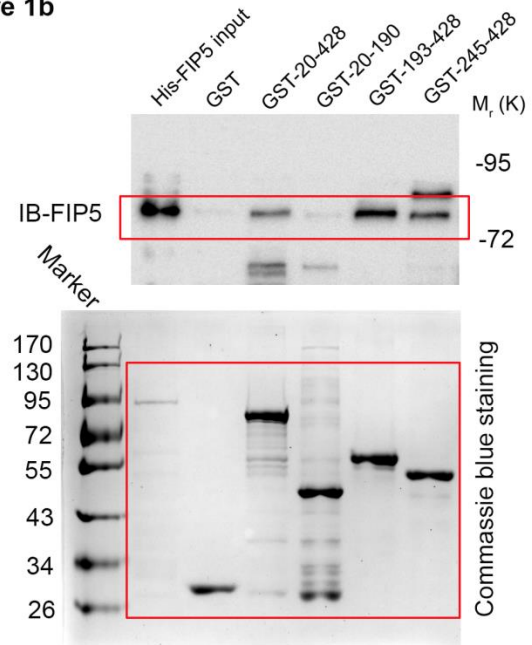

**Figure 1c**

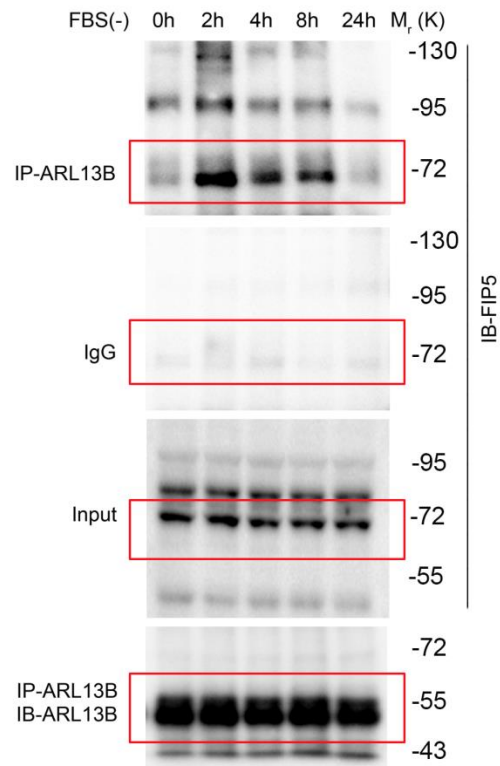

**Supplementary Figure 8.** Uncropped scans of blots shown in Figure 1a, 1b and 1c.
